# Supplementary material for: Development of epigenetic biomarkers for the identification of sex and thermal stress in fish using DNA methylation analysis and machine learning procedures
Source: PubMed Central journal article supplement — Mol Ecol Resour. 2022 Nov 15;23(2):453–70. doi: 10.1111/1755-0998.13725 (PMC10098837; doi:10.1111/1755-0998.13725), 2022-11-15
Supplement: MEN-23-453-s001.pdf [file MEN-23-453-s001.pdf]

# MOLECULAR ECOLOGY RESOURCES

Supplemental Information for:

## Development of epigenetic biomarkers for the identification of sex and thermal stress in fish using DNA methylation analysis and machine learning procedures

Valdivieso A<sup>1</sup>, Anastasiadi, D<sup>1,2</sup>, Ribas L.1, Piferrer F.<sup>1\*</sup>

1 Institut de Ciències del Mar, Consejo Superior de Investigaciones Científicas (CSIC), Barcelona, Spain

2 Current address: The New Zealand Institute for Plant and Food Research Limited, Nelson Research Centre, 293–297 Akersten Street, Port Nelson, Nelson 7010, New Zealand

\* Correspondence: Dr Francesc Piferrer: [piferrer@icm.csic.es](mailto:piferrer@icm.csic.es)

### Table of Contents:

|                  |          |
|------------------|----------|
| <b>Table S1</b>  | Page 2   |
| <b>Table S2</b>  | Page 3-6 |
| <b>Table S3</b>  | Page 7   |
| <b>Table S4</b>  | Page 7   |
| <b>Table S5</b>  | Page 8-9 |
| <b>Table S6</b>  | Page 10  |
| <b>Figure S1</b> | Page 11  |
| <b>Figure S2</b> | Page 12  |
| <b>Figure S3</b> | Page 13  |
| <b>Figure S4</b> | Page 14  |

# MOLECULAR ECOLOGY RESOURCES

## Supplementary tables

**Table S1.** Information of samples used in this study at 90 days post-fertilization. Number of fish per temperature and sex and the number of samples for DNA methylation analysis

| Family       | Temperature (°C) | Phenotypic sex | Number fish | Number samples for analysis |
|--------------|------------------|----------------|-------------|-----------------------------|
| 1            | 28               | Male           | 39          | 11                          |
|              |                  | Female         | 29          | 12                          |
|              | 35               | Male           | 77          | 12                          |
|              |                  | Female         | 0           | 0                           |
| 2            | 28               | Male           | 17          | 11                          |
|              |                  | Female         | 22          | 10                          |
|              | 35               | Male           | 32          | 5                           |
|              |                  | Female         | 18          | 13                          |
| <b>Total</b> |                  |                | <b>234</b>  | <b>74</b>                   |

# MOLECULAR ECOLOGY RESOURCES

**Table S2.** Information of the ten genes selected for this study. Gene name, symbol, detailed sequences for the bisulfite primers and information related to the amplicon: positions in the genome, number of CpG sites, CpG island and annealing temperature

| Gene name                                       | anti-Müllerian hormone          | double-sex and mab-3 related transcription factor 1 | double-sex and mab-3 related transcription factor 3a |
|-------------------------------------------------|---------------------------------|-----------------------------------------------------|------------------------------------------------------|
| Gene symbol                                     | <i>amh</i>                      | <i>dmrt1</i>                                        | <i>dmrt3a</i>                                        |
| Reference sequence                              | NM_001007779                    | NM_205628                                           | NM_001005779                                         |
| Chromosome                                      | 22                              | 5                                                   | 5                                                    |
| Strand                                          | -                               | +                                                   | +                                                    |
| Forward primer (5' to 3')                       | TTTTATTTTATTAATAAATTAAGGTATGTGA | AATATTTTTTATTGTGGTGTGGTT                            | TTTTGTAATTTTTATGTTGTAATAAGTTA                        |
| Reverse primer (5' to 3')                       | AACACTCCTCCAAAATATAAAAAC        | CAAAATAACCTCTCATAACCTTATC                           | CACACTTAAAAATCCTCTAAAAAAAAC                          |
| Start coordinate amplicon                       | 20736331                        | 44344542                                            | 44400282                                             |
| End coordinate amplicon                         | 20736847                        | 44345024                                            | 44400732                                             |
| Amplicon size bp and relative position from TSS | 517 (-217, +300)                | 483 (-249, +234)                                    | 451 (-366, +85)                                      |
| Total number of CpG                             | 15                              | 24                                                  | 18                                                   |
| Number of CpG before TSS                        | 7                               | 10                                                  | 12                                                   |
| Number of CpG islands                           | 1                               | 2                                                   | 2                                                    |
| Temperature annealing (°C)                      | 51                              | 53                                                  | 53                                                   |

# MOLECULAR ECOLOGY RESOURCES

Table S2 (Continued)

|                                                 |                                                         |                                               |                               |
|-------------------------------------------------|---------------------------------------------------------|-----------------------------------------------|-------------------------------|
| Gene name                                       | cytochrome P450, family 19, subfamily A, polypeptide 1a | hydroxysteroid (11- $\beta$ ) dehydrogenase 2 | forkhead box L2a              |
| Gene symbol                                     | <i>cyp19a1a</i>                                         | <i>hsd11b2</i>                                | <i>foxl2a</i>                 |
| Reference sequence                              | NM_131154                                               | NM_212720                                     | NM_001045252                  |
| Chromosome                                      | 18                                                      | 7                                             | 15                            |
| Strand                                          | -                                                       | -                                             | +                             |
| Forward primer (5' to 3')                       | TATTTTTGTTTGTAGGTTTGAT                                  | GTAAAGTTTGGTTATTGGGTTTG                       | TTTATAAATAGGTTTAATTTATAAAAA   |
| Reverse primer (5' to 3')                       | CAACAATATTATAACTATAACTCCACAC                            | CAACCATACCACCACTAAAAACATA                     | ACTATTCTACCATCCCTTCTTATTCTTCT |
| Start coordinate amplicon                       | 39655109                                                | 34854510                                      | 7060278                       |
| End coordinate amplicon                         | 39655578                                                | 34854994                                      | 7060715                       |
| Amplicon size bp and relative position from TSS | 470 (-326, +144)                                        | 485 (-362, +123)                              | 438 (-159, +279)              |
| Total number of CpG                             | 15                                                      | 9                                             | 26                            |
| Number of CpG before TSS                        | 9                                                       | 5                                             | 5                             |
| Number of CpG islands                           | 1                                                       | 0                                             | 2                             |
| Temperature annealing ( $^{\circ}$ C)           | 53                                                      | 59                                            | 50                            |

# MOLECULAR ECOLOGY RESOURCES

Table S2 (Continued)

| Gene name                                       | cytochrome P450, family 11, subfamily A, polypeptide 1 | cytochrome P450, family 11, subfamily C, polypeptide 1 | hydroxysteroid (17- $\beta$ ) dehydrogenase 1 |
|-------------------------------------------------|--------------------------------------------------------|--------------------------------------------------------|-----------------------------------------------|
| Gene symbol                                     | <i>cyp11a1</i>                                         | <i>cyp11c1</i>                                         | <i>hsd17b1</i>                                |
| Reference sequence                              | NM_152953                                              | NM_001080204                                           | NM_205584                                     |
| Chromosome                                      | 25                                                     | 16                                                     | 3                                             |
| Strand                                          | +                                                      | -                                                      | -                                             |
| Forward primer (5' to 3')                       | GGGGTTAAATTTGTTATTGATATATTTTG                          | TTTTTTTTGATTTGTGTTTTTTTATAGTAA                         | ATTGTGATTAATAATTTATAAGATGTATGA                |
| Reverse primer (5' to 3')                       | ATAAACATTCCTAAAACCTCCCAT                               | AACTCCTCCATATATTTATACATAC                              | CAATAATCATACATTAACACAAAATAATA                 |
| Start coordinate amplicon                       | 22224239                                               | 54645580                                               | 17897321                                      |
| End coordinate amplicon                         | 22224672                                               | 54645995                                               | 17897746                                      |
| Amplicon size bp and relative position from TSS | 434 (-230, +204)                                       | 416 (-201, +215)                                       | 426 (-394, +30)                               |
| Total number of CpG                             | 8                                                      | 19                                                     | 6                                             |
| Number of CpG before TSS                        | 0                                                      | 2                                                      | 6                                             |
| Number of CpG islands                           | 0                                                      | 1                                                      | 0                                             |
| Temperature annealing ( $^{\circ}$ C)           | 53                                                     | 57                                                     | 53                                            |

# MOLECULAR ECOLOGY RESOURCES

Table S2 (Continued)

|                                                 |                                               |
|-------------------------------------------------|-----------------------------------------------|
| Gene name                                       | hydroxysteroid (17- $\beta$ ) dehydrogenase 3 |
| Gene symbol                                     | <i>hsd17b3</i>                                |
| Reference sequence                              | NM_200364                                     |
| Chromosome                                      | 8                                             |
| Strand                                          | +                                             |
| Forward primer (5' to 3')                       | TTTTGGTGGATTTATATAATAATAGG                    |
| Reverse primer (5' to 3')                       | ACTCTATCAAACCTCTCTTAATTTCTACTA                |
| Start coordinate amplicon                       | 29856058                                      |
| End coordinate amplicon                         | 29856474                                      |
| Amplicon size bp and relative position from TSS | 417 (-370, +47)                               |
| Total number of CpG                             | 4                                             |
| Number of CpG before TSS                        | 4                                             |
| Number of CpG islands                           | 0                                             |
| Temperature annealing (°C)                      | 53                                            |

# MOLECULAR ECOLOGY RESOURCES

**Table S3** Nextera Adapters sequences and the primers sequences with complementary to Nextera Adapters use to validate the amplification of region of interest by Sanger sequencing

|                                     |                                                    |                                                     |
|-------------------------------------|----------------------------------------------------|-----------------------------------------------------|
| <b>Nextera Adapters sequences</b>   | TCGTCGGCAGCGTCAGATGTGTATAAGAGACAG+[forward primer] | GTCTCGTGGGCTCGGAGATGTGTATAAGAGACAG+[reverse primer] |
| <b>Primer for Sanger sequencing</b> | CGGCAGCGTCAGATGTGTAT                               | GTGGGCTCGGAGATGTGTAT                                |

**Table S4.** Primer sequences used for qPCR gene expression analysis

| Gene            | Gene name                                                    | Gene symbol     | Reference sequence | Forward (5' to 3')       | Reverse (5' to 3')      | Reference |
|-----------------|--------------------------------------------------------------|-----------------|--------------------|--------------------------|-------------------------|-----------|
| Target genes    | anti-Müllerian hormone                                       | <i>amh</i>      | NM_001007779       | ACAACCCGAAGGTCAACCCGC    | GTGGCATGTTGGTCAGTTGGCTG | [1]       |
|                 | cytochrome P450, family 11, subfamily A, polypeptide 1       | <i>cyp11a1</i>  | NM_152953          | GAGGCCTCAGGAATGTCCAC     | GGTCCACGCGTCTACATTGA    | [2]       |
|                 | cytochrome P450, family 11, subfamily C, polypeptide 1       | <i>cyp11c1</i>  | NM_001080204       | CCTCGGGCCCATATACAGAGA    | CGTCCCCTTCTTGAGGAAGA    | [1]       |
|                 | cytochrome P450, family 19, subfamily A, polypeptide 1a      | <i>cyp19a1a</i> | NM_131154          | GATATTTGCTCAGAGCCATGGA   | GCTCTGGCCAGCTAAAACACT   | [1]       |
|                 | doublesex and mab-3 related transcription factor 1           | <i>dmrt1</i>    | NM_205628          | TGCCAGGTGGCGTTACGG       | CGGGTGATGGCGTCTGAG      | [1]       |
|                 | hydroxysteroid (11- $\beta$ ) dehydrogenase 2                | <i>hsd11b2</i>  | NM_212720          | GGGGGTCAAAGTTTCCACTA     | TGGAAGAGCTCCTTGGTCTC    | [3]       |
|                 | hydroxysteroid (17- $\beta$ ) dehydrogenase 1                | <i>hsd17b1</i>  | NM_205584          | GTCTGATGGGTCCTCTGGAA     | TGCCGTGTCTTTTTCTTCA     | [4]       |
| Reference genes | eukaryotic translation elongation factor 1 $\alpha$ 1 like 1 | <i>eef1a1l1</i> | NM_131263          | GGAGGCTGCCAACTTCAACGC    | GGCGATGTGAGCAGTGTGGC    | [5]       |
|                 | ribosomal protein L13a                                       | <i>rpl13a</i>   | NM_212784          | TCTGGAGGACTGTAAGAGGTATGC | AGACGCACAATCTTGAGAGCAG  | [5]       |

# MOLECULAR ECOLOGY RESOURCES

**Table S5.** Information of the sequencing data for each sample: quality of the raw data, number of reads before and after trimming, efficiency alignment and bisulfite conversion efficiency

| Sample      | Quality scores<br>≥Q30 (%) | Number reads<br>before trimming | number reads<br>after trimming | Alignment<br>efficiency (%) | Bisulfite conversion<br>efficiency (%) |
|-------------|----------------------------|---------------------------------|--------------------------------|-----------------------------|----------------------------------------|
| Fam1_1_MHT  | 84.0                       | 663270                          | 660193                         | 87.4                        | 99.7                                   |
| Fam1_1_MLT  | 86.8                       | 579689                          | 576949                         | 89.1                        | 99.7                                   |
| Fam1_10_FLT | 85.6                       | 870587                          | 865560                         | 35.4                        | 99.1                                   |
| Fam1_10_MHT | 70.6                       | 374875                          | 373317                         | 63.2                        | 99.7                                   |
| Fam1_11_MLT | 70.4                       | 85423                           | 84977                          | 53.7                        | 99.5                                   |
| Fam1_12_FLT | 87.0                       | 510934                          | 508119                         | 42.9                        | 99.7                                   |
| Fam1_12_MHT | 77.2                       | 502960                          | 500941                         | 75.3                        | 99.7                                   |
| Fam1_13_MHT | 81.4                       | 414473                          | 412616                         | 84.6                        | 99.7                                   |
| Fam1_13_MLT | 75.7                       | 478134                          | 476238                         | 68.1                        | 99.5                                   |
| Fam1_14_FLT | 85.5                       | 784384                          | 780630                         | 45.6                        | 99.3                                   |
| Fam1_14_MHT | 78.1                       | 654094                          | 651414                         | 84.0                        | 99.6                                   |
| Fam1_15_FLT | 84.2                       | 612595                          | 609742                         | 59.6                        | 99.6                                   |
| Fam1_15_MHT | 82.5                       | 410448                          | 408414                         | 95.1                        | 99.6                                   |
| Fam1_16_MLT | 76.5                       | 522846                          | 520469                         | 73.8                        | 99.6                                   |
| Fam1_17_FLT | 83.6                       | 744496                          | 741491                         | 54.7                        | 99.7                                   |
| Fam1_17_MHT | 84.3                       | 491794                          | 489523                         | 88.5                        | 99.6                                   |
| Fam1_18_MLT | 78.3                       | 661699                          | 658812                         | 74.2                        | 99.6                                   |
| Fam1_19_MHT | 56.5                       | 438897                          | 436493                         | 46.1                        | 99.6                                   |
| Fam1_19_MLT | 73.4                       | 745698                          | 742215                         | 66.3                        | 99.6                                   |
| Fam1_2_MHT  | 72.5                       | 473882                          | 472157                         | 82.4                        | 99.7                                   |
| Fam1_2_MLT  | 82.8                       | 491815                          | 489408                         | 86.3                        | 99.5                                   |
| Fam1_20_MLT | 84.8                       | 730424                          | 726889                         | 52.4                        | 99.6                                   |
| Fam1_21_MLT | 77.4                       | 561900                          | 560018                         | 61.6                        | 99.7                                   |
| Fam1_22_MLT | 87.7                       | 745466                          | 741832                         | 59.0                        | 99.5                                   |
| Fam1_3_FLT  | 89.2                       | 311504                          | 310089                         | 53.0                        | 99.5                                   |
| Fam1_4_MHT  | 78.1                       | 288904                          | 287760                         | 78.5                        | 99.7                                   |
| Fam1_4_MLT  | 81.6                       | 278121                          | 276585                         | 78.2                        | 99.5                                   |
| Fam1_5_MHT  | 75.4                       | 221927                          | 220856                         | 77.9                        | 99.7                                   |
| Fam1_5_MLT  | 84.2                       | 242394                          | 241227                         | 84.5                        | 99.6                                   |
| Fam1_6_MHT  | 74.3                       | 631565                          | 629024                         | 72.5                        | 99.7                                   |
| Fam1_6_MLT  | 79.4                       | 377090                          | 375559                         | 69.7                        | 99.5                                   |
| Fam1_7_FLT  | 87.2                       | 333887                          | 332213                         | 57.7                        | 99.3                                   |
| Fam1_8_FLT  | 87.3                       | 346344                          | 344728                         | 68.3                        | 99.6                                   |
| Fam1_9_FLT  | 86.4                       | 776875                          | 772537                         | 51.7                        | 99.6                                   |
| Fam2_0_MLT  | 67.3                       | 619509                          | 615936                         | 66.3                        | 99.7                                   |
| Fam2_1_MHT  | 83.9                       | 302069                          | 300544                         | 83.4                        | 99.6                                   |
| Fam2_10_FHT | 83.7                       | 517175                          | 513880                         | 80.3                        | 99.6                                   |



# MOLECULAR ECOLOGY RESOURCES

|               |       |         |         |       |       |
|---------------|-------|---------|---------|-------|-------|
| Fam2_10_FLT   | 80.6  | 239459  | 238005  | 74.6  | 99.6  |
| Fam2_11_FLT   | 54.7  | 393647  | 391249  | 41.1  | 99.6  |
| # Fam2_11_MHT | #86.6 | #471489 | #469075 | #82.9 | #96.1 |
| Fam2_12_FHT   | 88.3  | 236425  | 235230  | 82.1  | 99.6  |
| Fam2_12_FLT   | 60.2  | 712937  | 708940  | 53.3  | 99.7  |
| Fam2_13_FLT   | 71.0  | 818943  | 815503  | 60.1  | 99.7  |
| Fam2_13_MHT   | 89.7  | 232734  | 231501  | 83.8  | 99.3  |
| # Fam2_14_FHT | #67.4 | #86     | #86     | #73.3 | #97.7 |
| Fam2_14_MLT   | 71.1  | 545839  | 541353  | 75.0  | 99.5  |
| Fam2_15_FHT   | 80.3  | 533056  | 527861  | 86.0  | 99.6  |
| Fam2_15_MLT   | 70.6  | 589836  | 586707  | 73.1  | 99.7  |
| Fam2_16_FHT   | 87.0  | 373490  | 371253  | 84.4  | 99.5  |
| Fam2_16_FLT   | 84.5  | 508395  | 505826  | 75.5  | 99.6  |
| Fam2_17_MHT   | 87.1  | 240551  | 238992  | 84.0  | 99.4  |
| Fam2_17_MLT   | 74.0  | 367667  | 365510  | 72.0  | 99.6  |
| Fam2_18_MHT   | 85.6  | 513416  | 510763  | 82.9  | 99.5  |
| Fam2_19_FLT   | 83.8  | 3199    | 311175  | 83.9  | 99.6  |
| Fam2_19_MHT   | 91.1  | 379215  | 377245  | 89.4  | 99.5  |
| Fam2_2_MHT    | 90.4  | 685302  | 681900  | 92.3  | 99.6  |
| Fam2_2_MLT    | 72.3  | 306695  | 304636  | 71.1  | 99.5  |
| Fam2_20_FHT   | 87.9  | 410936  | 408532  | 84.9  | 99.5  |
| Fam2_20_FLT   | 73.7  | 602202  | 599546  | 68.9  | 99.6  |
| Fam2_3_FHT    | 75.1  | 549351  | 547091  | 69.0  | 99.6  |
| Fam2_3_MLT    | 81.7  | 333823  | 332216  | 83.7  | 99.5  |
| Fam2_4_FHT    | 81.7  | 725085  | 721156  | 75.9  | 99.5  |
| Fam2_4_FLT    | 69.5  | 68151   | 67667   | 70.1  | 99.7  |
| Fam2_5_FHT    | 86.1  | 428220  | 426024  | 87.4  | 99.6  |
| Fam2_5_MLT    | 58.6  | 510120  | 503954  | 53.0  | 99.6  |
| Fam2_6_FHT    | 80.5  | 344182  | 342546  | 76.1  | 99.5  |
| Fam2_6_FLT    | 72.2  | 318457  | 316750  | 76.2  | 99.7  |
| Fam2_7_FHT    | 83.5  | 383269  | 381043  | 81.4  | 99.6  |
| # Fam2_7_MLT  | #38.3 | #759440 | #755330 | #22.6 | #97.2 |
| Fam2_8_MHT    | 83.6  | 719377  | 715464  | 78.5  | 99.5  |
| Fam2_8_MLT    | 68.9  | 166694  | 165697  | 63.2  | 99.7  |
| Fam2_9_FHT    | 84.2  | 277488  | 276009  | 78.0  | 99.6  |
| Fam2_9_MLT    | 77.6  | 258539  | 256769  | 73.9  | 99.7  |
| <b>Mean</b>   | 79.3  | 469779  | 471392  | 71.9  | 99.6  |
| <b>SD</b>     | 8.08  | 185638  | 186554  | 13.63 | 11.38 |
| <b>SEM</b>    | 0.97  | 22188   | 22297   | 1.63  | 1.36  |

# Values not computed because they did not pass the quality control check.

\* Information of samples: Fam1 or Fam2= family 1 and 2. Number followed of fam correspond number assigned to sample. M= male; F = female; LT= low temperature (28°C) and HT = high temperature (35°C).

# MOLECULAR ECOLOGY

## RESOURCES

**Table S6.** Mean DNA methylation levels for each gene according to family, treatment and sex. Notice that for Family 1 at 35°C we did not have females due to full masculinization of the fish

|                 | Family |        |       |       |        |       |        |  |
|-----------------|--------|--------|-------|-------|--------|-------|--------|--|
|                 | 1      |        |       |       | 2      |       |        |  |
|                 | 28°C   |        | 35°C  | 28°C  |        | 35°C  |        |  |
| Gene            | Male   | Female | Male  | Male  | Female | Male  | Female |  |
| <i>cyp19a1a</i> | 95.53  | 32.63  | 95.80 | 32.42 | 39.73  | 93.86 | 33.62  |  |
| <i>cyp11a1</i>  | 67.44  | 40.20  | N/A   | 41.92 | 43.21  | 69.24 | 46.56  |  |
| <i>cyp11c1</i>  | 86.43  | 63.38  | 87.08 | 64.57 | 61.84  | 86.36 | 66.41  |  |
| <i>hsd11b2</i>  | 89.11  | 25.50  | 89.24 | 20.07 | 23.58  | 85.86 | 24.17  |  |
| <i>hsd17b1</i>  | 79.60  | 32.16  | 79.44 | 37.38 | 33.12  | 78.84 | 32.83  |  |
| <i>hsd17b3</i>  | 97.35  | 90.84  | 97.02 | 89.45 | 90.33  | 96.38 | 91.33  |  |
| <i>amh</i>      | 85.93  | 33.28  | 88.45 | 34.77 | 26.77  | 88.84 | 31.49  |  |
| <i>dmrt1</i>    | 3.15   | 29.81  | 3.36  | 23.76 | 25.98  | 5.03  | 27.21  |  |
| <i>dmrt3a</i>   | 1.35   | 2.69   | 1.23  | 2.22  | 2.29   | 1.68  | 2.49   |  |
| <i>foxl2a</i>   | 0.60   | 0.87   | 0.58  | 0.89  | 1.03   | 0.77  | 1.20   |  |
| <b>Mean</b>     | 60.65  | 35.13  | 60.24 | 34.74 | 34.79  | 60.69 | 35.73  |  |
| <b>SD</b>       | 39.38  | 25.09  | 41.66 | 25.47 | 25.25  | 38.77 | 25.85  |  |

# MOLECULAR ECOLOGY RESOURCES

## Supplementary figures

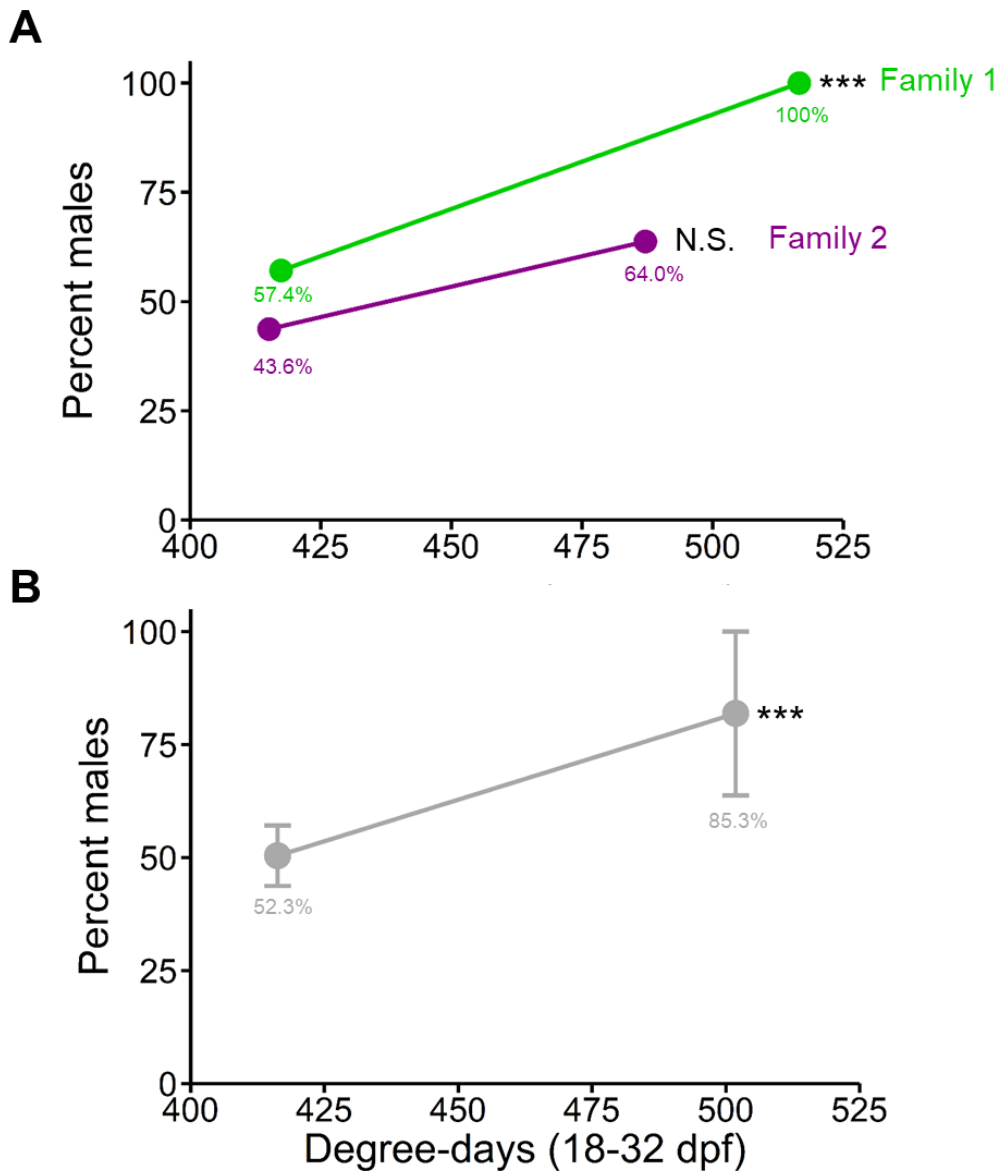

**Figure S1.** Percent males as a function of temperature (expressed as accumulated degree-days) during the sex differentiation period (18–32 days post-fertilization, dpf) in **A)** Separate families 1 and 2 and **B)** Grouping families 1 and 2. Sex ratio between groups was analyzed by  $\chi^2$  test. \*\*\* =  $P < 0.001$ ; N.S = no significant. The sample size in each family is shown in Table S2.

# MOLECULAR ECOLOGY RESOURCES

**A**

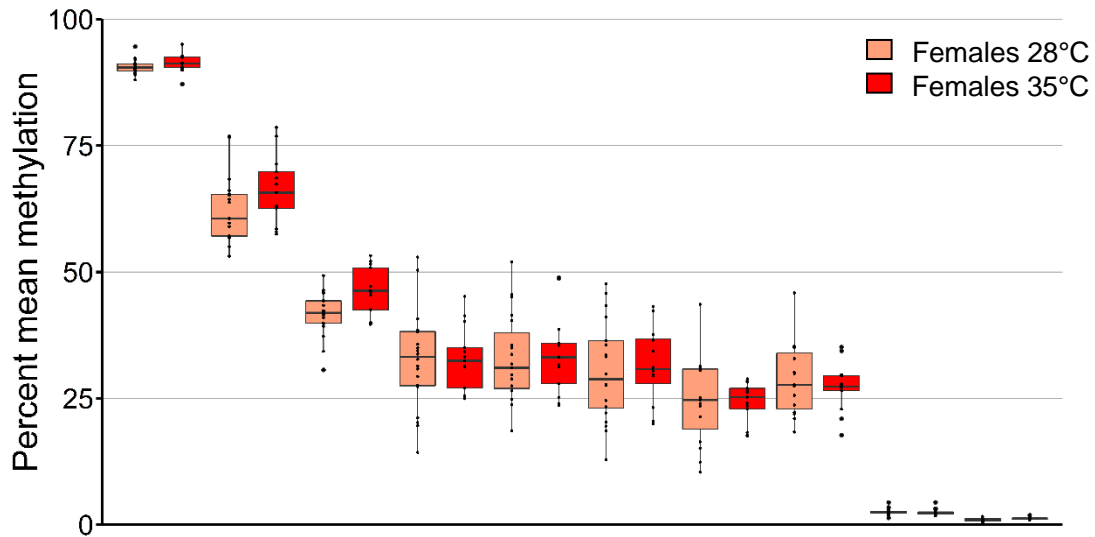

**B**

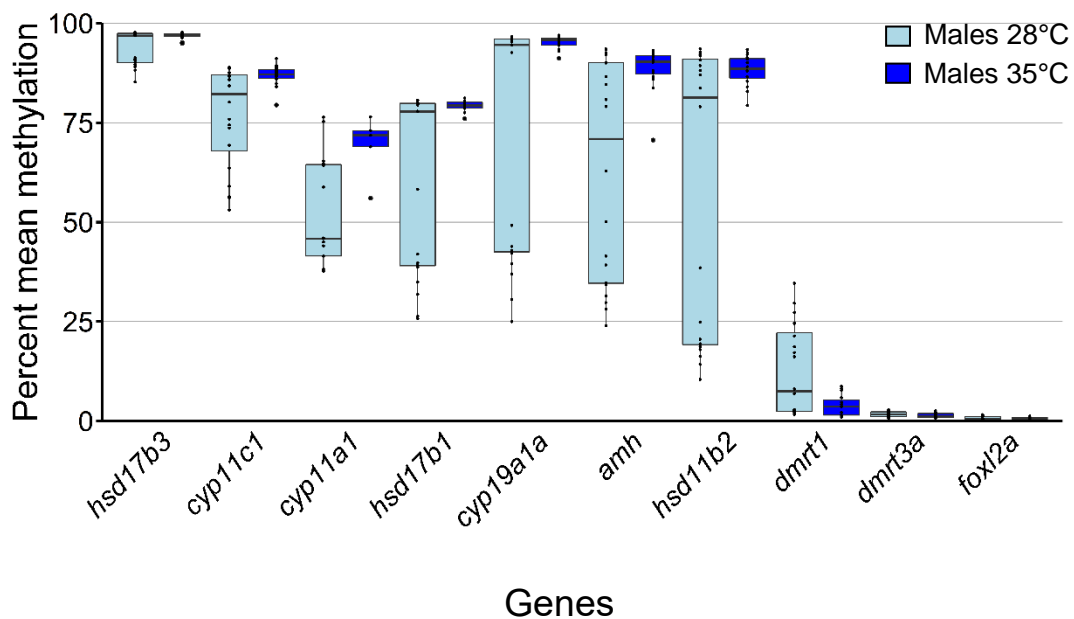

**Figure S2.** DNA methylation levels per gene in **A)** females and **B)** males exposed to control (low) and high temperature. The boxes include the values distributed between the lower and upper quartiles. The black dots in the boxplots correspond to individual samples and the black line inside the box represents the median.

# MOLECULAR ECOLOGY RESOURCES

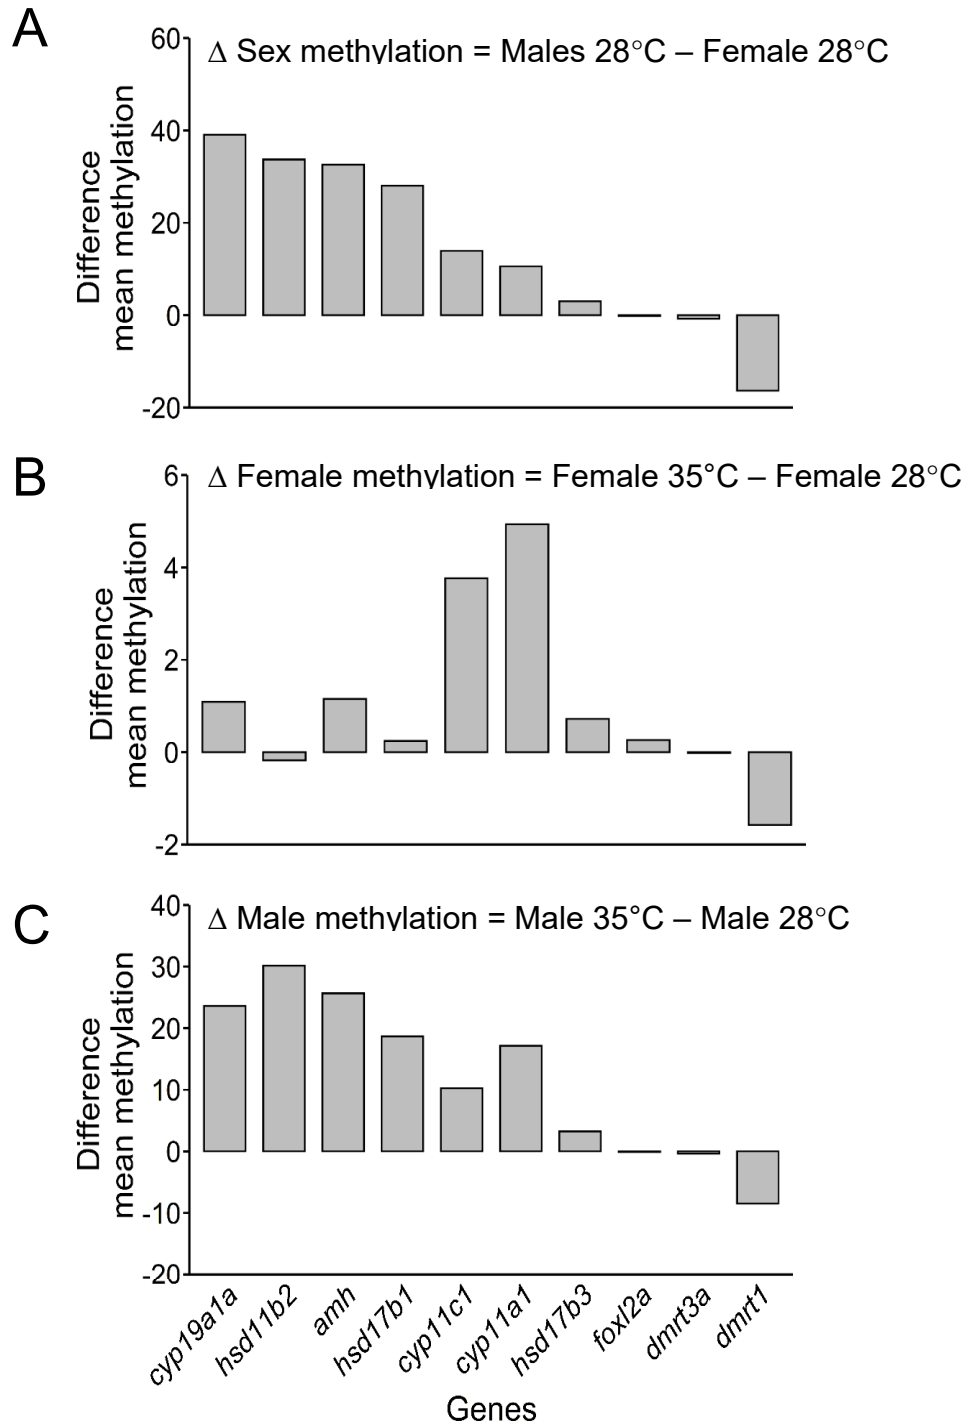

**Figure S3.** Differences of the percent mean DNA methylation levels in the steroidogenic enzymes and growth and transcription factors combining the methylation data of the two families. **A)** Differences of the percent mean DNA methylation levels between males minus females exposed to control temperature; **B)** Differences of the percent mean DNA methylation levels between females exposed to high minus control temperature. **C)** Differences of the percent mean DNA methylation levels between males exposed to high minus control temperature.

# MOLECULAR ECOLOGY RESOURCES

A

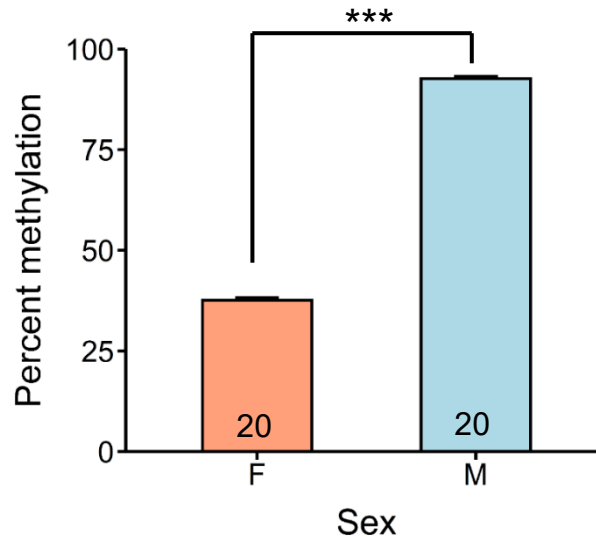

B

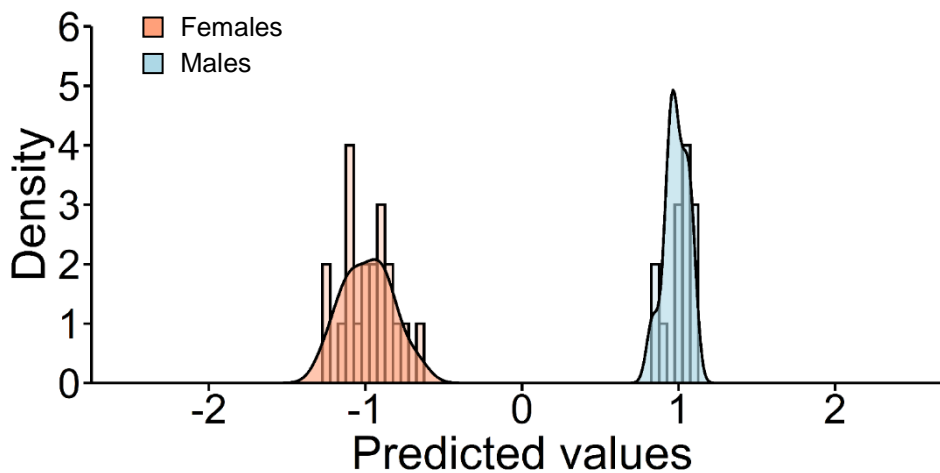

**Figure S4.** A) DNA methylation levels of the promoter regions of *cyp19a1a* according to sex: female (F) and male (M) of external offspring derived from a female and male (used for cross-validation) raised at 28°C. The numbers of fish analyzed in each group are shown inside the bars. A Kruskal-Wallis test was applied (\*\*\*) =  $P < 0.001$ ). Data are shown as mean  $\pm$  s.e.m. B) Histogram of the 40 samples (20 males and 20 females) from external offspring classified using the training test from machine learning (Flexible Discriminant Analysis) using the methylation levels of the 15 CpGs located in the *cyp19a1a* amplicon.

# MOLECULAR ECOLOGY

## RESOURCES

### References

1. Tzung KW, Goto R, Saju JM, Sreenivasan R, Saito T, Arai K, Yamaha E, Hossain MS, Calvert ME, Orbán L. Early depletion of primordial germ cells in zebrafish promotes testis formation. *Stem Cell Rep.* 2015;4(1):61-73.
2. Hao R, Bondesson M, Singh AV, Riu A, McCollum CW, Knudsen TB, Gorelick DA, Gustafsson JÅ. Identification of estrogen target genes during zebrafish embryonic development through transcriptomic analysis. *PLoS ONE.* 2013;8(11):e79020.
3. Tokarz J, Norton W, Möller G, De Angelis MH, Adamski J. Zebrafish 20 $\beta$ -hydroxysteroid dehydrogenase type 2 is important for glucocorticoid catabolism in stress response. *PLoS ONE.* 2013;8(1):e54851.
4. Ma Z, Tang S, Su G, Miao Y, Liu H, Xie Y, Giesy JP, Saunders DM, Hecker M, Yu H. Effects of tris (2-butoxyethyl) phosphate (TBOEP) on endocrine axes during development of early life stages of zebrafish (*Danio rerio*). *Chemosphere.* 2016;144:1920-7.
5. Tang R, Dodd A, Lai D, McNabb WC, Love DR. Validation of zebrafish (*Danio rerio*) reference genes for quantitative real-time RT-PCR normalization. *Acta Bioch Bioph Sin.* 2007;39(5):384-90.
